# Supplementary material for: Neuroprotective effects of p62(SQSTM1)-engineered lactic acid bacteria in Alzheimer’s disease: a pre-clinical study
Source: publisher site journal article supplement (doi:10.18632/aging.103900), 2020-08-28
Supplement: Supplementary file [file aging-v12i16-103900-supplementary-material-SD3.pdf]

## SUPPLEMENTARY TABLE

**Supplementary Table 1. KEGG pathways modified upon LAB and p62-LAB treatment. Only pathways with a p<0.05 are shown.**

| KEEG pathways                                                                          | Groups              | P-value |
|----------------------------------------------------------------------------------------|---------------------|---------|
| catechol degradation to $\beta$ -keto adipate                                          | Control vs. p62-LAB | 0.0129  |
| 3-phenylpropanoate and 3-(3-hydroxyphenyl)propanoate degradation to 2-oxopent-4-enoate | Control vs. p62-LAB | 0,0295  |
| 3-phenylpropanoate and 3-(3-hydroxyphenyl)propanoate degradation to 2-oxopent-4-enoate | LAB vs. p62-LAB     | 0.0097  |
| 3-phenylpropanoate degradation                                                         | Control vs. p62-LAB | 0.0332  |
| 3-phenylpropanoate degradation                                                         | LAB vs. p62-LAB     | 0.0097  |
| toluene degradation III (aerobic) (via p-cresol)                                       | Control vs. p62-LAB | 0.0078  |
| catechol degradation III (ortho-cleavage pathway)                                      | Control vs. p62-LAB | 0.0129  |
| aromatic compounds degradation via $\beta$ -keto adipate                               | Control vs. p62-LAB | 0.0129  |
| superpathway of salicylate degradation                                                 | Control vs. p62-LAB | 0.0129  |
| 4-methylcatechol degradation (ortho cleavage)                                          | Control vs. p62-LAB | 0.0129  |
| cinnamate and 3-hydroxycinnamate degradation to 2-oxopent-4-enoate                     | Control vs. p62-LAB | 0.0218  |
| cinnamate and 3-hydroxycinnamate degradation to 2-oxopent-4-enoate                     | LAB vs. p62-LAB     | 0.0295  |
| 3-phenylpropanoate and 3-(3-hydroxyphenyl)propanoate degradation                       | Control vs. p62-LAB | 0.0218  |
| 3-phenylpropanoate and 3-(3-hydroxyphenyl)propanoate degradation                       | LAB vs. p62-LAB     | 0.0295  |
